# Supplementary material
Source: PubMed Central journal article supplement (PMC7015556)
Supplement: ehp-128-019001-s003.pdf [file ehp-128-019001-s003.pdf]

**Note to readers with disabilities:** *EHP* strives to ensure that all journal content is accessible to all readers. However, some figures and Supplemental Material published in *EHP* articles may not conform to [508 standards](#) due to the complexity of the information being presented. If you need assistance accessing journal content, please contact [ehp508@niehs.nih.gov](mailto:ehp508@niehs.nih.gov). Our staff will work with you to assess and meet your accessibility needs within 3 working days.

### **Supplemental Material**

#### **Erratum: “Inter-Host Transmission of Carbapenemase-Producing *Escherichia coli* among Humans and Backyard Animals”**

Jiyun Li, Zhenwang Bi, Shizhen Ma, Baoli Chen, Chang Cai, Junjia He, Stefan Schwarz, Chengtao Sun, Yuqing Zhou, Jia Yin, Anette Hulth, Yongqiang Wang, Zhangqi Shen, Shaolin Wang, Congming Wu, Lennart E. Nilsson, Timothy R. Walsh, Stefan Börjesson, Jianzhong Shen, Qiang Sun, and Yang Wang

#### **Table of Contents**

**Additional File-** Excel Document
